# Supplementary material for: Multiparametric monitoring of chemotherapy treatment response in locally advanced breast cancer using quantitative ultrasound and diffuse optical spectroscopy
Source: PubMed Central journal article supplement (PMC4991417; doi:10.18632/oncotarget.7844), 2016-03-02
Supplement: oncotarget-07-19762-s001.pdf [file oncotarget-07-19762-s001.pdf]

## Multiparametric monitoring of chemotherapy treatment response in locally advanced breast cancer using quantitative ultrasound and diffuse optical spectroscopy

### Supplementary Materials

**Supplementary Table S1A: Sensitivity (%Sn), Specificity (%Sp) and AUC for multivariate (pairwise) QUS and DOSI parameters with AUC > 0.8**

| Week 1                 |      |      |                |          |
|------------------------|------|------|----------------|----------|
| Combined Parameters    | %Sn  | %Sp  | AUC (Logistic) | <i>p</i> |
| MBF + HbO <sub>2</sub> | 85.7 | 87.5 | 0.973          | 0.000    |
| MBF + HbT              | 71.4 | 75.0 | 0.857          | 0.006    |
| SI + Hb                | 64.3 | 62.5 | 0.839          | 0.009    |
| SI + HbO <sub>2</sub>  | 100  | 100  | 1.000          | 0.000    |
| SI + HbT               | 85.7 | 87.5 | 0.929          | 0.001    |
| SI + %Water            | 71.4 | 75.0 | 0.866          | 0.005    |
| SI + %Lipids           | 71.4 | 62.5 | 0.857          | 0.006    |
| SI + SP                | 71.4 | 62.5 | 0.857          | 0.006    |
| SI + SA                | 78.6 | 75.0 | 0.830          | 0.012    |
| SI + TOI               | 78.6 | 75.0 | 0.839          | 0.009    |
| SS + HbO <sub>2</sub>  | 100  | 100  | 1.000          | 0.000    |
| SS + HbT               | 85.7 | 87.5 | 0.955          | 0.000    |
| SS + %Water            | 78.6 | 75.0 | 0.848          | 0.008    |
| SS + %Lipids           | 78.6 | 75.0 | 0.830          | 0.012    |
| SS + SP                | 78.6 | 75.0 | 0.830          | 0.012    |
| SS + SA                | 78.6 | 75.0 | 0.857          | 0.006    |
| SS + TOI               | 64.3 | 62.5 | 0.821          | 0.014    |

**Supplementary Table S1B:**

| Week 4                 |     |     |                |          |
|------------------------|-----|-----|----------------|----------|
| Combined Parameters    | %Sn | %Sp | AUC (Logistic) | <i>p</i> |
| MBF + Hb               | 100 | 100 | 1.00           | 0.000    |
| MBF + HbO <sub>2</sub> | 100 | 100 | 1.00           | 0.000    |
| MBF + HbT              | 100 | 100 | 1.00           | 0.000    |
| MBF + %Water           | 100 | 100 | 1.00           | 0.000    |
| MBF + %Lipids          | 100 | 100 | 1.00           | 0.000    |
| MBF + SP               | 100 | 100 | 1.00           | 0.000    |
| MBF + SA               | 100 | 100 | 1.00           | 0.000    |
| MBF + TOI              | 100 | 100 | 1.00           | 0.000    |

|                       |      |      |       |       |
|-----------------------|------|------|-------|-------|
| SI + Hb               | 85.7 | 87.5 | 0.955 | 0.000 |
| SI + HbO <sub>2</sub> | 85.7 | 87.5 | 0.982 | 0.000 |
| SI + HbT              | 85.7 | 87.5 | 0.982 | 0.000 |
| SI + %Water           | 85.7 | 87.5 | 0.964 | 0.000 |
| SI + %Lipids          | 100  | 100  | 1.000 | 0.000 |
| SI + SP               | 100  | 100  | 1.000 | 0.000 |
| SI + SA               | 100  | 100  | 1.000 | 0.000 |
| SI + TOI              | 85.7 | 87.5 | 0.982 | 0.000 |
|                       |      |      |       |       |
| SS + Hb               | 92.9 | 100  | 0.955 | 0.000 |
| SS + HbO <sub>2</sub> | 85.7 | 87.5 | 0.938 | 0.001 |
| SS + HbT              | 85.7 | 87.5 | 0.955 | 0.000 |
| SS + %Water           | 85.7 | 87.5 | 0.955 | 0.000 |
| SS + %Lipids          | 100  | 87.5 | 0.991 | 0.000 |
| SS + SP               | 100  | 87.5 | 0.991 | 0.000 |
| SS + SA               | 100  | 100  | 1.000 | 0.000 |
| SS + TOI              | 92.9 | 87.5 | 0.982 | 0.000 |

**Supplementary Table S1C:**

| <b>Week 8</b>              |            |            |                       |          |
|----------------------------|------------|------------|-----------------------|----------|
| <b>Combined Parameters</b> | <b>%Sn</b> | <b>%Sp</b> | <b>AUC (Logistic)</b> | <b>p</b> |
| MBF + Hb                   | 100        | 100        | 1.00                  | 0.000    |
| MBF + HbO <sub>2</sub>     | 100        | 100        | 1.00                  | 0.000    |
| MBF + HbT                  | 100        | 100        | 1.00                  | 0.000    |
| MBF + %Water               | 100        | 100        | 1.00                  | 0.000    |
| MBF + %Lipids              | 100        | 100        | 1.00                  | 0.000    |
| MBF + SP                   | 100        | 100        | 1.00                  | 0.000    |
| MBF + SA                   | 100        | 100        | 1.00                  | 0.000    |
| MBF + TOI                  | 100        | 100        | 1.00                  | 0.000    |
|                            |            |            |                       |          |
| SI + Hb                    | 100        | 100        | 1.00                  | 0.000    |
| SI + HbO <sub>2</sub>      | 100        | 100        | 1.00                  | 0.000    |
| SI + HbT                   | 100        | 100        | 1.00                  | 0.000    |
| SI + %Water                | 100        | 100        | 1.00                  | 0.000    |
| SI + %Lipids               | 100        | 100        | 1.00                  | 0.000    |
| SI + SP                    | 100        | 100        | 1.00                  | 0.000    |
| SI + SA                    | 100        | 100        | 1.00                  | 0.000    |
| SI + TOI                   | 100        | 100        | 1.00                  | 0.000    |
|                            |            |            |                       |          |
| SS + Hb                    | 100        | 100        | 1.00                  | 0.000    |
| SS + HbO <sub>2</sub>      | 100        | 100        | 1.00                  | 0.000    |
| SS + HbT                   | 100        | 100        | 1.00                  | 0.000    |
| SS + %Water                | 71.4       | 75.0       | 0.893                 | 0.003    |
| SS + %Lipids               | 100        | 100        | 1.00                  | 0.000    |

|                 |      |      |       |       |
|-----------------|------|------|-------|-------|
| <b>SS + SP</b>  | 100  | 100  | 1.00  | 0.000 |
| <b>SS + SA</b>  | 78.6 | 75.0 | 0.911 | 0.002 |
| <b>SS + TOI</b> | 100  | 100  | 1.00  | 0.000 |

Pairwise combinations were reported with AUC > 0.8. Analyses were performed at week 1, 4 and 8.
